# Supplementary material for: Lhx5 promotes forebrain development and activates transcription of secreted Wnt antagonists
Source: Oxford University Press journal article supplement (doi:10.1242/dev.02485), 2006-07-20
Supplement: dev02485t1.pdf [file dev02485t1.pdf]

**Table S1. Exogenous Lhx5 partially rescues Wnt8a-induced forebrain deficiency**

|                    |                        | % Eyeless ( <i>n</i> ) | % Two-eye ( <i>n</i> ) | % Malformed ( <i>n</i> ) |
|--------------------|------------------------|------------------------|------------------------|--------------------------|
| 10 pg <i>wnt8a</i> | Alone                  | 52% (22)               | 5% (2)                 | 43% (18)                 |
|                    | Plus <i>lhx5</i>       | 7% (3)                 | 59% (26)               | 34% (15)                 |
| 20 pg <i>wnt8a</i> | Alone                  | 56% (49)               | 6% (5)                 | 38% (34)                 |
|                    | Plus <i>lhx5</i>       | 4% (3)                 | 54% (37)               | 42% (29)                 |
|                    | Alone                  | 55% (56)               | 2% (2)                 | 43% (44)                 |
|                    | Plus <i>lhx5</i>       | 7% (7)                 | 57% (61)               | 36% (39)                 |
|                    | Plus <i>lhx5-trunc</i> | 44% (28)               | 14% (9)                | 42% (27)                 |
| 40 pg <i>wnt8a</i> | Alone                  | 53% (20)               | 0% (0)                 | 47% (18)                 |
|                    | Plus <i>lhx5</i>       | 30% (12)               | 15% (6)                | 55% (22)                 |
